# Supplementary material for: Ancestral Alleles in the Human Genome Based on Population Sequencing Data
Source: PubMed Central journal article supplement (PMC4447449; doi:10.1371/journal.pone.0128186), 2015-05-28

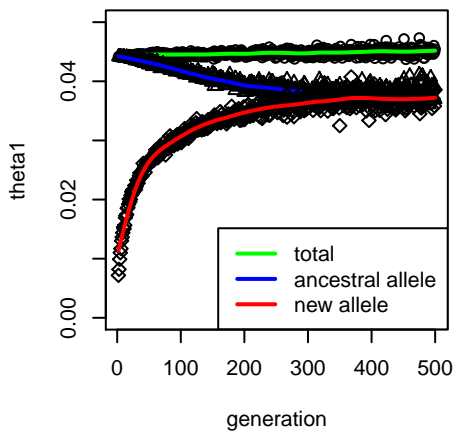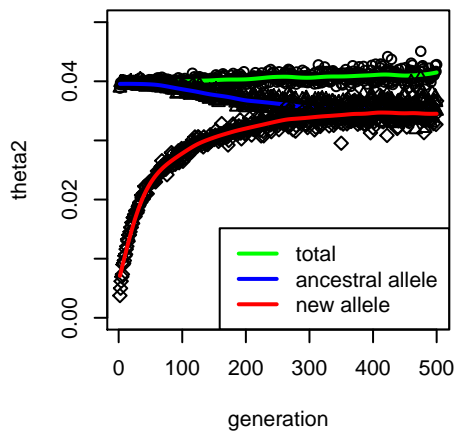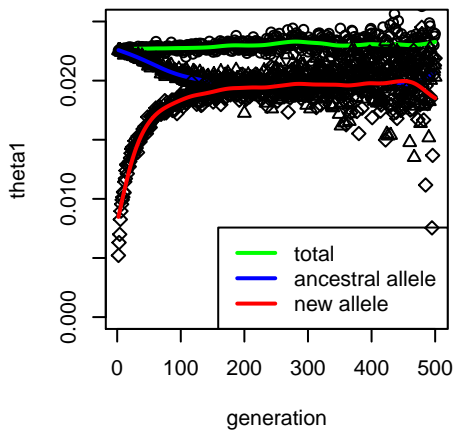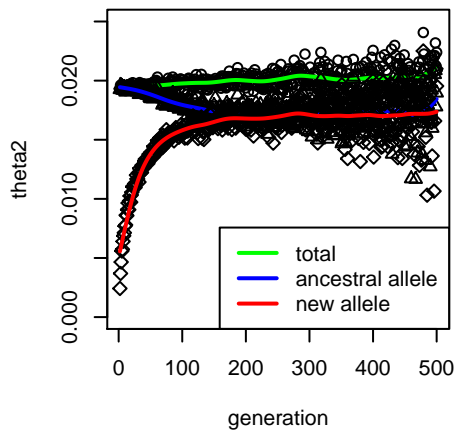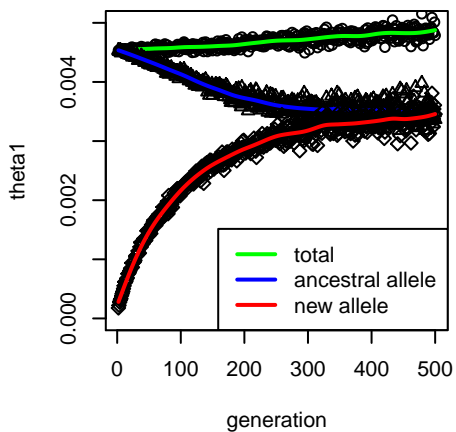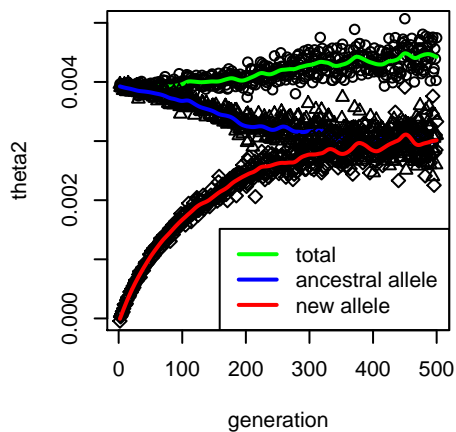

Supplement: pone.0128186.s001.pdf [file pone.0128186.s001.pdf]
