# Supplementary material for: Ancestral Alleles in the Human Genome Based on Population Sequencing Data
Source: PubMed Central journal article supplement (PMC4447449; doi:10.1371/journal.pone.0128186), 2015-05-28

**A. EUR exon**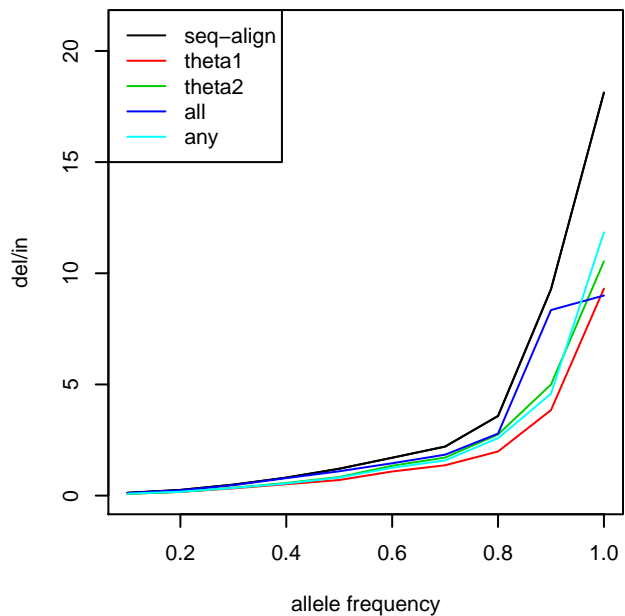**B. EUR gene**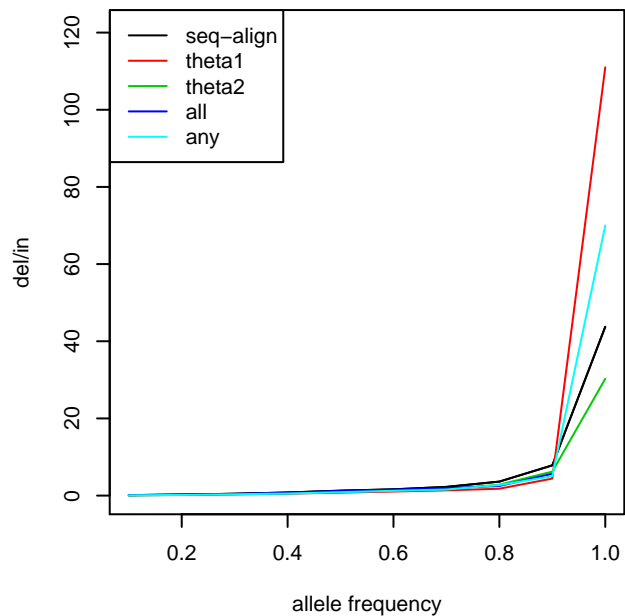**C. EUR repeats**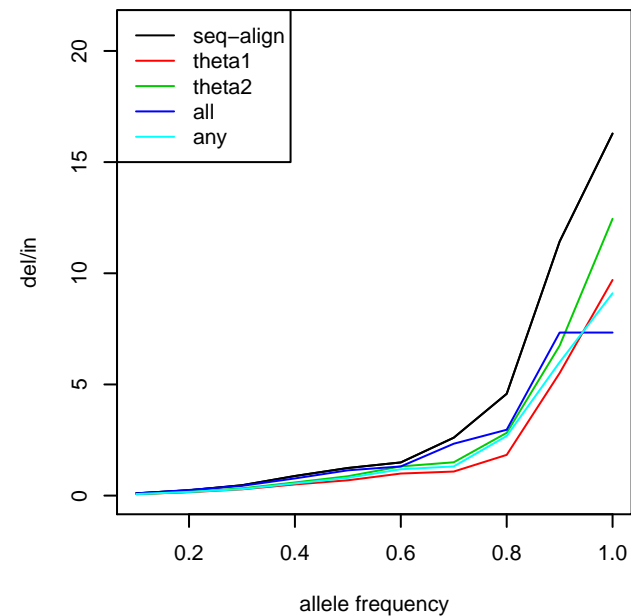**D. EUR trratio**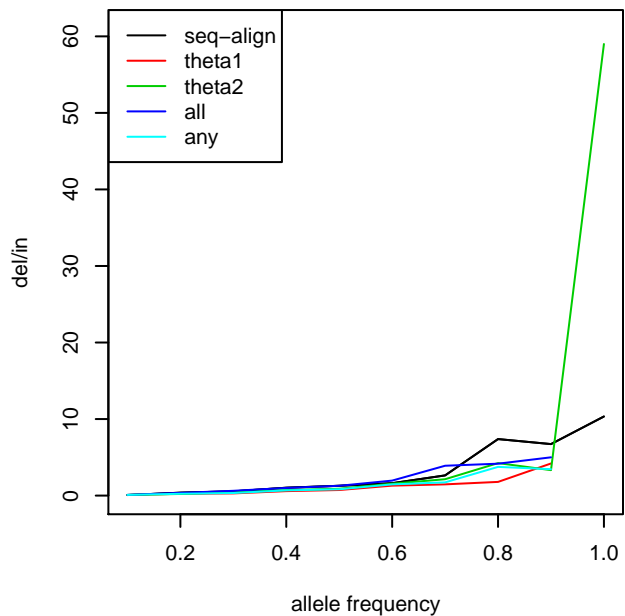**E. EUR total**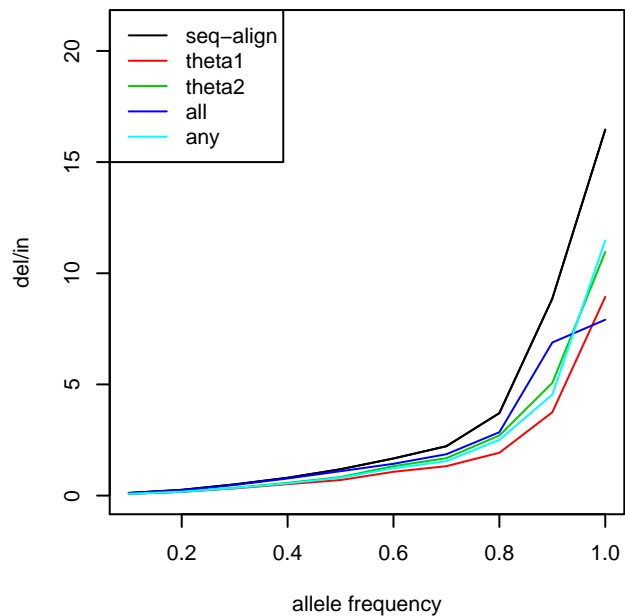**F. YRI total**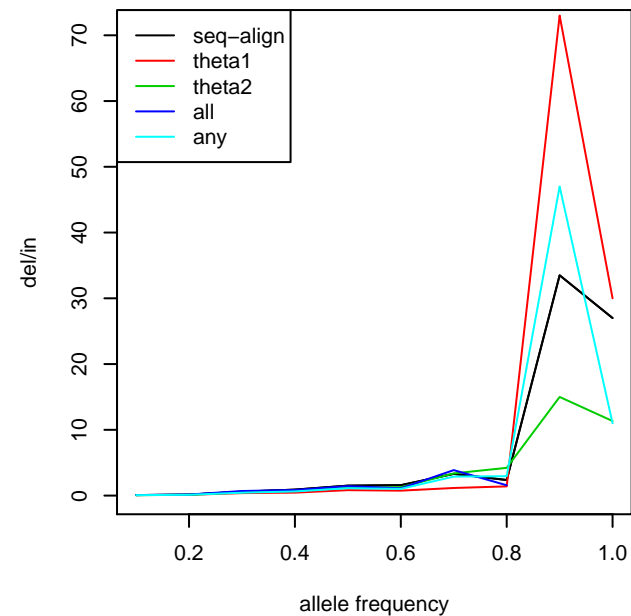

Supplement: pone.0128186.s006.pdf [file pone.0128186.s006.pdf]
